# Supplementary material
Source: Springer Nature journal article supplement (https://www.springermedizin.de/resource/supplementary/12885_2012_3723_MOESM4_ESM.pdf/9465940)

# ALK fusion positive cases (n=35)

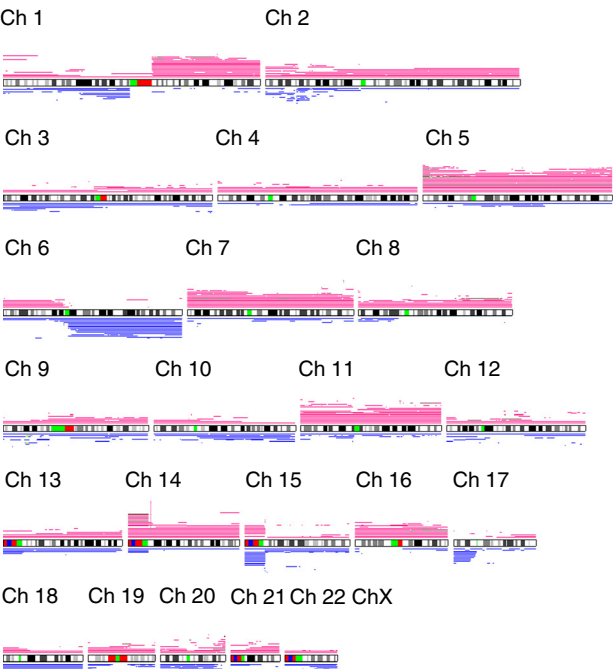

# ALK fusion negative cases (n=95)

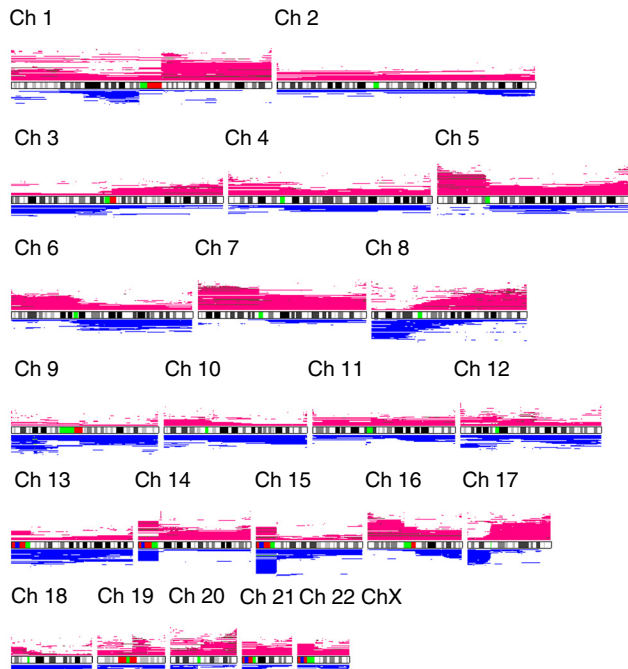

Supplement: MOESM4 [file 9465940]
